# Supplementary material for: Development of a Continuous System for 2-Phenylethanol Bioproduction by Yeast on Whey Permeate-Based Medium
Source: MDPI journal article supplement (doi:10.3390/molecules26237388), 2021-12-06
Supplement: s1 [file s1]

# Development of a Continuous System for 2-phenylethanol Bioproduction by Yeast on Whey Permeate-Based Medium

Karolina Drężek <sup>1</sup>, Joanna Kozłowska <sup>1</sup>, Anna Detman <sup>2</sup> and Jolanta Mierzejewska <sup>1,\*</sup>

<sup>1</sup> Chair of Drug and Cosmetics Biotechnology, Faculty of Chemistry, Warsaw University of Technology, 00-664 Warsaw, Poland; karolina.drezek@pw.edu.pl (K.D.); kozłowska.joanna.1997@gmail.com (J.K.)

<sup>2</sup> Laboratory of White Biotechnology, Institute of Biochemistry and Biophysics, Polish Academy of Sciences, 02-106 Warsaw, Poland; annadetman@ibb.waw.pl

\* Correspondence: jolanta.mierzejewska@pw.edu.pl

**Table S1.** Source of *Kluyveromyces lactis* WUT175, *Kluyveromyces marxianus* WUT216 and *K. marxianus* WUT240 strains, and their physiological characteristics.

| Strain Number                 | WUT175                     | WUT216           | WUT240                     |
|-------------------------------|----------------------------|------------------|----------------------------|
| Source                        | mare's milk,<br>Kyrgyzstan | kefyr,<br>Poland | mare's milk,<br>Kyrgyzstan |
| GeneBank accession numbers    |                            |                  |                            |
| ITS1- 5.8S-ITS2 rRNA          | OK093387                   | OK093388         | OK093389                   |
| 26S rRNA                      | OK093398                   | OK093399         | OK093400                   |
| Physiological Characteristics |                            |                  |                            |
| Assimilation-growth           |                            |                  |                            |
| D-glucose                     | +                          | +                | +                          |
| D-xylose                      | -                          | +                | +                          |
| D-galactose                   | +                          | +                | +                          |
| Lactose                       | +                          | +                | +                          |
| Maltose                       | +                          | +                | d                          |
| Sucrose                       | +                          | +                | +                          |
| Glycerol                      | +                          | +                | -                          |
| Ethanol                       | +                          | +                | +                          |
| Temperature-growth            |                            |                  |                            |
|                               | 10–30 °C                   | 10–42 °C         | 15–42 °C                   |
| Enzymatic Activity            |                            |                  |                            |
| Lipolytic                     | +                          | +                | -                          |
| Amylolytic                    | -                          | -                | -                          |
| Proteolytic                   | -                          | -                | -                          |
| Cellulolytic                  | -                          | -                | -                          |

„+ / -” – growth/ no growth, „d” - delayed growth.
